# Supplementary material for: A Staging Scheme for the Development of the Moth Midge Clogmia albipunctata
Source: PubMed Central journal article supplement (PMC3883683; doi:10.1371/journal.pone.0084422), 2014-01-07
Supplement: pone.0084422.s002.pdf [file pone.0084422.s002.pdf]

# Supporting File S2

| time | 1 nucleus | 2 nuclei | 3 nuclei | 4 nuclei | 5 nuclei | 6 nuclei | 7 nuclei | 8 nuclei | n   |
|------|-----------|----------|----------|----------|----------|----------|----------|----------|-----|
| 10'  | 98        | 2        | 0        | 0        | 0        | 0        | 0        | 0        | 100 |
| 20'  | 89        | 10       | 1        | 0        | 0        | 0        | 0        | 0        | 100 |
| 30'  | 12        | 83       | 4        | 1        | 0        | 0        | 0        | 0        | 100 |
| 40'  | 2         | 32       | 44       | 21.33    | 0.67     | 0        | 0        | 0        | 150 |
| 50'  | 3.33      | 16       | 45.33    | 35.33    | 0        | 0        | 0        | 0        | 150 |
| 60'  | 1         | 11       | 41       | 31       | 14       | 2        | 0        | 0        | 200 |
| 70'  | 2         | 5        | 28.5     | 47.5     | 14       | 2.5      | 0.5      | 0        | 200 |
| 80'  | 0         | 1        | 3        | 50       | 32       | 11       | 3        | 0        | 100 |
| 90'  | 0         | 0.67     | 10.67    | 35.33    | 29.33    | 22       | 1.33     | 0.67     | 150 |
| 100' | 3         | 6        | 0        | 6        | 28       | 48       | 5        | 4        | 100 |

Percentage of embryos at every time point that have 1, 2, 3, 4, 5, 6, 7 or 8 nuclei.

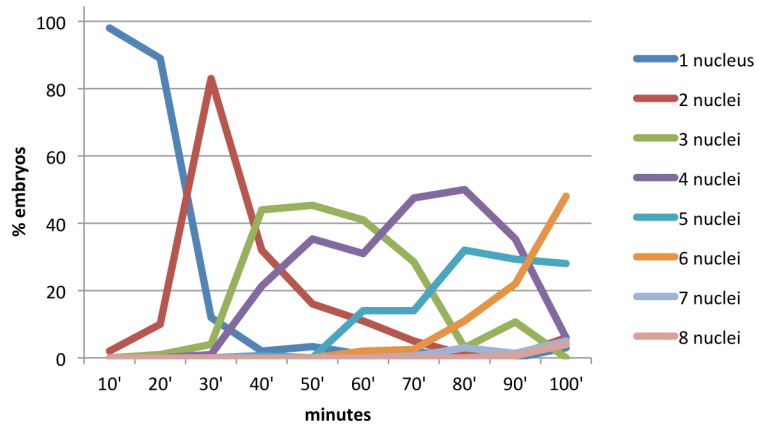

**Supporting File S2. Percentage of cleavage stage embryos from 0 to 100 minutes after egg activation that exhibit a given number of nuclei**

Supporting File for: Jiménez-Guri, E., Wotton, K. R., Gavilán, B., & Jaeger, J. (2013). A staging scheme for the development of the moth midge *Clogmia albipunctata*. PLoS One.
